# Supplementary material for: The use of ASH-15 flowstone as a matrix-matched reference material for laser-ablation U − Pb geochronology of calcite
Source: Copernicus journal article supplement (doi:10.5194/gchron-3-35-2021), 2021-01-14
Supplement: Supplementary file 1 [file gchron-3-35-2021-supplement.zip]

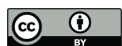

## *Supplement of*

# **The use of ASH-15 flowstone as a matrix-matched reference material for laser-ablation U–Pb geochronology of calcite**

**Perach Nuriel et al.**

*Correspondence to:* Perach Nuriel (nuriel@gsi.gov.il)

- gchron-3-35-2021-supplement-title-page.pdf
- SupFile.xlsx

The copyright of individual parts of the supplement might differ from the CC BY 4.0 License.
